# Supplementary material for: Venom kinematics during prey capture inConus: the biomechanics of a rapid injection system
Source: Oxford University Press journal article supplement (doi:10.1242/jeb.035550), 2010-02-12
Supplement: jeb035550-sup-035550-tables1.pdf [file jeb035550-sup-035550-tables1.pdf]

Table S1. Comparison between longitudinal musculature and two different smooth muscle cell (SMCs) types found in the muscular sphincter

|              | Cross-sectional size of fiber ( $\mu\text{m}$ ) | Diameter of thick filament (nm) | Density of thick filaments in $1 \mu\text{m}^2$ |
|--------------|-------------------------------------------------|---------------------------------|-------------------------------------------------|
| Longitudinal | $2.2 \pm 0.6$                                   | $44 \pm 0.6$                    | $92 \pm 6.9$                                    |
| SMCa         | $8.9 \pm 1.7$                                   | $64 \pm 8.0$                    | $44.6 \pm 1.4$                                  |
| SMCb         | $5.7 \pm 1.5$                                   | $43 \pm 0.9$                    | $85 \pm 5.6$                                    |

Pairwise Student's *t*-tests reveal that all SMCs examined had statistically significant differences in fiber diameter ( $P < 0.05$ ). SMCa has a statistically significant difference in thick filament diameter as well as a decreased filament density ( $P < 0.05$ ). All other values were not significant ( $P > 0.05$ ).
