# Supplementary figures and images for: Venom kinematics during prey capture inConus: the biomechanics of a rapid injection system
Source: Oxford University Press journal article supplement (doi:10.1242/jeb.035550), 2010-02-12

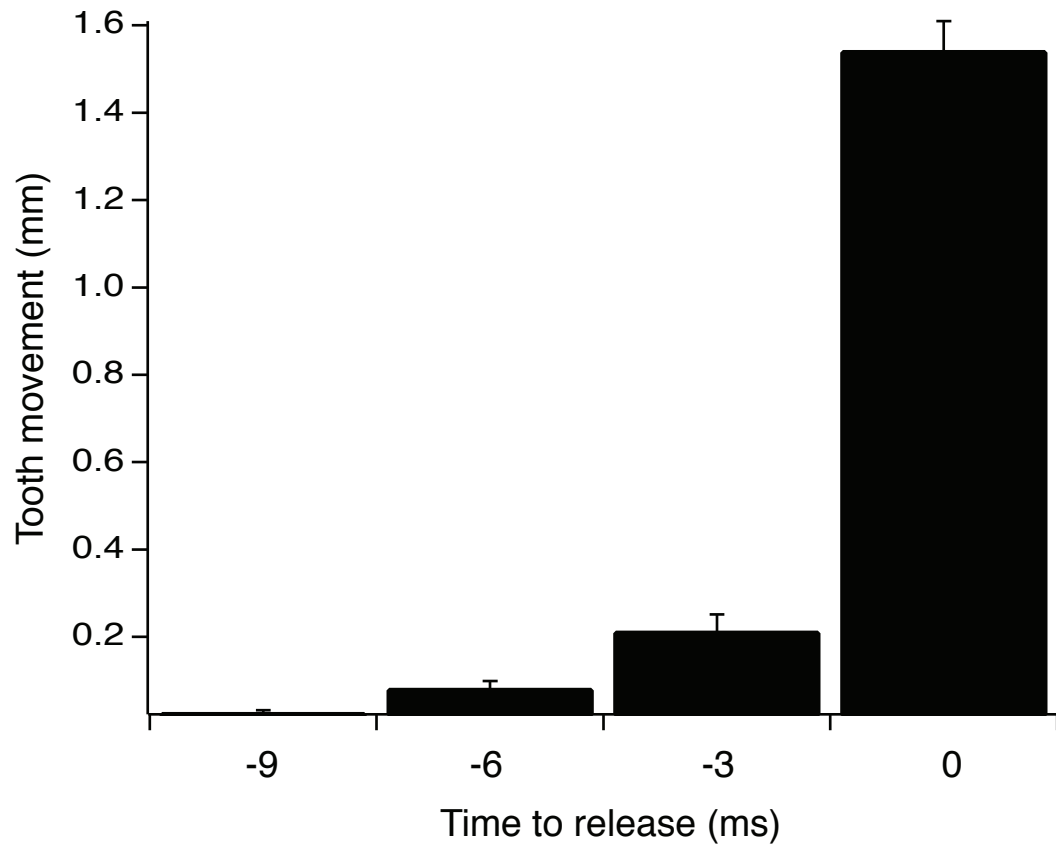

Supplement: jeb035550-sup-035550figs1.pdf [file jeb035550-sup-035550figs1.pdf]

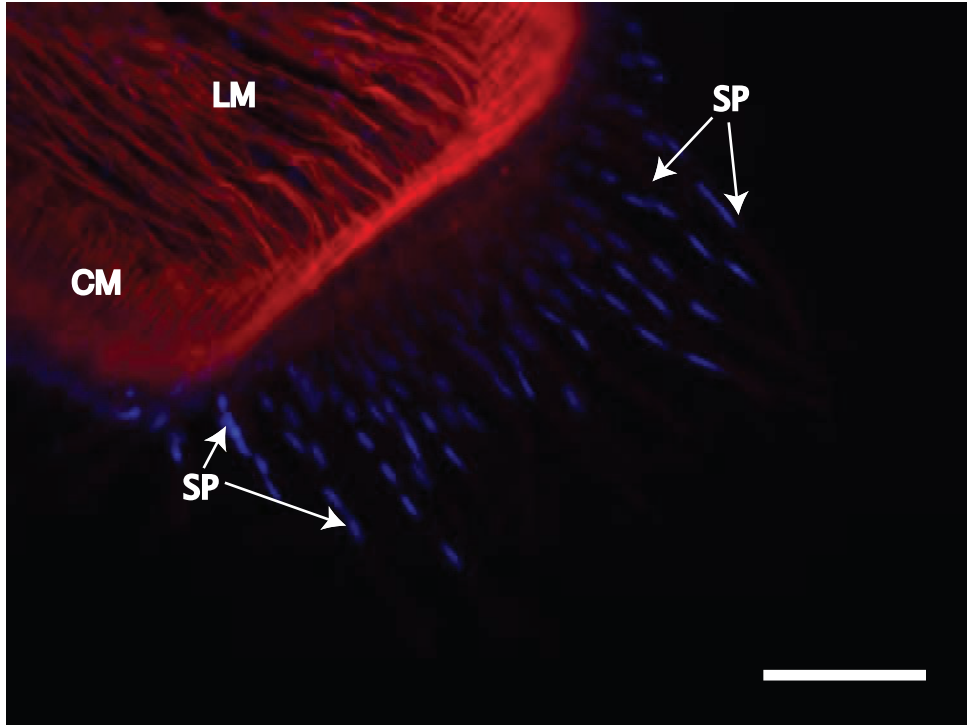

Supplement: jeb035550-sup-035550figs2.pdf [file jeb035550-sup-035550figs2.pdf]

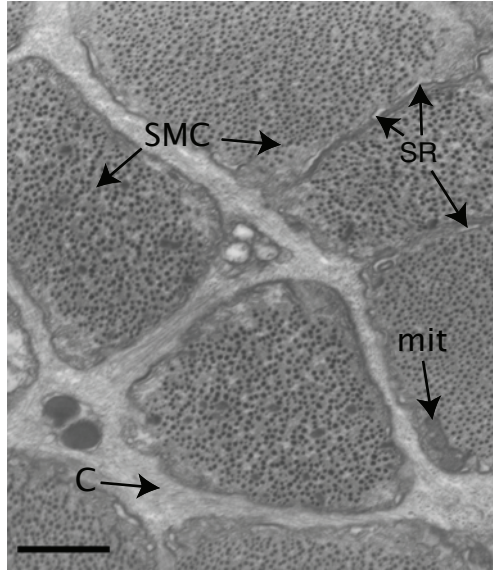

Supplement: jeb035550-sup-035550figs4.pdf [file jeb035550-sup-035550figs4.pdf]
